# Supplementary material for: Multimodal group-based tele-prehabilitation for cancer patients and caregivers: a pragmatic multicentre hybrid implementation-effectiveness study protocol
Source: Frontiers journal article supplement (doi:10.3389/fonc.2025.1566489), 2025-09-26

## EXERCISE SESSION STRUCTURE

- 3 x 60-minute session per week
- Days: Monday, Wednesday, and Friday
- Time: 9AM-10AM or 3PM-4PM
- Type of aerobic stations:
  - **Intervals:** Monday + Friday (Table 1)
  - **Continuous:** Wednesday (Table 2)

**Table 1. Exercise session structure with INTERVAL AEROBIC STATIONS**

| STATIONS                                   | SETS | BORG-10 scale | EFFORT DURATION | REST TIME (between exercises) |
|--------------------------------------------|------|---------------|-----------------|-------------------------------|
| <b>WARM-UP – 10 min</b>                    |      |               |                 |                               |
| Mobility exercises                         | -    |               | 5 min           | -                             |
| Cardio (low intensity)                     | -    |               | 5 min           | -                             |
| <b>MAIN SESSION – 45 min</b>               |      |               |                 |                               |
| <b>A – Aerobic → Intervals<sup>a</sup></b> |      |               |                 |                               |
| High knees                                 | 5    | 5-6           | 30sec           | -                             |
|                                            |      | 2-3           | 30 sec          | -                             |
| <b>B – Resistance<sup>b</sup></b>          |      |               |                 |                               |
| Surgery-specific                           | 2    | 3-6           | 45 sec          | 30 sec                        |
| Upper body – Pull                          |      |               | 45 sec          | 30 sec                        |
| Lower body – Squat variations              |      |               | 45 sec          | 30 sec                        |
| Upper body – Push                          |      |               | 45 sec          | 30 sec                        |
| <b>C – Aerobic → Intervals<sup>a</sup></b> |      |               |                 |                               |
| Speed skaters                              | 5    | 5-6           | 30 sec          | -                             |
|                                            |      | 2-3           | 30 sec          | -                             |
| <b>D – Resistance<sup>b</sup></b>          |      |               |                 |                               |
| Abdominals                                 | 2    | 3-6           | 45 sec          | 30 sec                        |
| Glutes                                     |      |               | 45 sec          | 30 sec                        |
| Lower back                                 |      |               | 45 sec          | 30 sec                        |
| <b>E – Aerobic → Intervals<sup>a</sup></b> |      |               |                 |                               |
| Quick feet (2 feet in, 2 feet out)         | 5    | 5-6           | 30 sec          | -                             |
|                                            |      | 2-3           | 30 sec          | -                             |
| <b>COOL-DOWN – 5 min</b>                   |      |               |                 |                               |
| Static stretches and breathing             | -    | 1-2           | 5 min           | -                             |

<sup>a</sup>Complete the 5-minute aerobic station using 30-second intervals. We recommend varying the exercises every minute, either by alternating between two exercises or by performing five different exercises. Be sure to move in all four directions throughout the session (front, back, right side, left side). Examples are provided in Table 1.

<sup>b</sup>Complete the resistance exercises as a circuit. Take a maximum 2-minute break at the end, then repeat the circuit. Use this break to adjust or correct exercises if needed.

**Table 2. Exercise session structure with CONTINUOUS AEROBIC STATIONS**

| STATIONS                                    | SETS | BORG-10 scale | EFFORT DURATION | REST TIME (between exercises) |
|---------------------------------------------|------|---------------|-----------------|-------------------------------|
| <b>WARM-UP – 10 min</b>                     |      |               |                 |                               |
| Mobility exercises                          | -    | 2-3           | 5 min           | -                             |
| Cardio – Low intensity                      | -    |               | 5 min           |                               |
| <b>MAIN SESSION – 45 min</b>                |      |               |                 |                               |
| <b>A – Aerobic → Continuous<sup>a</sup></b> |      |               |                 |                               |
| Jumping jacks (with or without jump)        | 1    | 3-4           | 1 min           | -                             |
| High knees                                  |      |               | 1 min           |                               |
| Shadow boxing                               |      |               | 1 min           |                               |
| Butt kicks                                  |      |               | 1 min           |                               |
| Quick feet (2 feet in, 2 feet out)          |      |               | 1 min           |                               |
| <b>B – Resistance<sup>b</sup></b>           |      |               |                 |                               |
| Surgery-specific                            | 2    | 3-6           | 45 sec          | 30 sec                        |
| Upper body – Pull                           |      |               | 45 sec          | 30 sec                        |
| Lower body – Squat variations               |      |               | 45 sec          | 30 sec                        |
| Upper body – Push                           |      |               | 45 sec          | 30 sec                        |
| <b>C – Aerobic → Continuous<sup>a</sup></b> |      |               |                 |                               |
| Speed skaters                               | 1    | 3-4           | 1 min           | -                             |
| Quick feet                                  |      |               | 1 min           |                               |
| Speed skaters                               |      |               | 1 min           |                               |
| Quick feet                                  |      |               | 1 min           |                               |
| Speed skaters                               |      |               | 1 min           |                               |
| <b>D – Resistance<sup>b</sup></b>           |      |               |                 |                               |
| Abdominals                                  | 2    | 3-6           | 45 sec          | 30 sec                        |
| Glutes                                      |      |               | 45 sec          | 30 sec                        |
| Lower back                                  |      |               | 45 sec          | 30 sec                        |
| <b>E – Aerobic → Continuous<sup>a</sup></b> |      |               |                 |                               |
| Jumping jacks (with or without jump)        | 1    | 3-4           | 1 min           | -                             |
| High knees                                  |      |               | 1 min           |                               |
| Shadow boxing                               |      |               | 1 min           |                               |
| Butt kicks                                  |      |               | 1 min           |                               |
| Quick feet (2 feet in, 2 feet out)          |      |               | 1 min           |                               |
| <b>COOL-DOWN – 5 min</b>                    |      |               |                 |                               |
| Static stretches and breathing              | -    | 1-2           | 5 min           | -                             |

<sup>a</sup>Complete the 5-minute aerobic station at a continuous intensity. We recommend varying the exercises every minute, either by alternating between two exercises or by performing five different exercises. Be sure to move in all four directions throughout the session (front, back, right side, left side). Examples are provided in Table 2.

<sup>b</sup>Complete the resistance exercises in a circuit. Take a maximum 2-minute break at the end, then repeat the circuit. Use this break to adjust or correct the exercises if needed

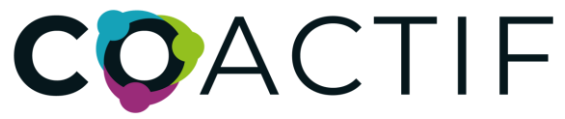

Supplement: Table_1.pdf [file Table_1.pdf]
